# Supplementary material
Source: PubMed Central journal article supplement (PMC7528218)
Supplement: NIHMS1630567-supplement-3.pdf [file NIHMS1630567-supplement-3.pdf]

## SUPPLEMENTARY MATERIAL

### SUPPLEMENTARY TABLES

Supplementary Table 1. Centre of Evidence-Based Medicine, levels of evidence of therapeutic studies. <http://www.cebm.net>

|    |                                                                                                                |
|----|----------------------------------------------------------------------------------------------------------------|
| 1A | Systematic review (with homogeneity) of RCTs                                                                   |
| 1B | Individual RCT (with narrow confidence intervals)                                                              |
| 1C | All or none study                                                                                              |
| 2A | Systematic review (with homogeneity) of cohort studies                                                         |
| 2B | Individual Cohort study (including low quality RCT, e.g. <80% follow-up)                                       |
| 2C | “Outcomes” research; Ecological studies                                                                        |
| 3A | Systematic review (with homogeneity) of case-control studies                                                   |
| 3B | Individual Case-control study                                                                                  |
| 4  | Case series and poor quality cohort and case-control study                                                     |
| 5  | Expert opinion without explicit critical appraisal or based on physiology bench research or “first principles” |

Supplementary Table 2. NCCN Categories of evidence.

---

|    |                                                                                                          |
|----|----------------------------------------------------------------------------------------------------------|
| 1  | Based upon high-level evidence, there is uniform NCCN consensus that the intervention is appropriate.    |
| 2A | Based upon lower-level evidence, there is uniform NCCN consensus that the intervention is appropriate.   |
| 2B | Based upon lower-level evidence, there is NCCN consensus that the intervention is appropriate.           |
| 3  | Based upon any level of evidence, there is major NCCN disagreement that the intervention is appropriate. |

---

Note: NCCN believes that the best management for any cancer patient is in a clinical trial. Participation in clinical trials is especially encouraged.

Supplementary Table 3. EBRT for prostate cancer: treatment characteristics and outcomes

| Study / location                  | Author, years of articles | Ref(s) | Era/Trial evaluating                      | RT type  | n     | total dose (Gy) | total fractions | Gy/fraction | FFBF def. | Risk group n |     |     | 5-year FFBF (%) |     |     | 5-year patient outcomes (%) |     |     | RTOG late Grade 3-4 toxicity |     |     |
|-----------------------------------|---------------------------|--------|-------------------------------------------|----------|-------|-----------------|-----------------|-------------|-----------|--------------|-----|-----|-----------------|-----|-----|-----------------------------|-----|-----|------------------------------|-----|-----|
|                                   |                           |        |                                           |          |       |                 |                 |             |           | L            | I   | H   | L               | I   | H   | OS                          | CSM | DM  | GU                           | GI  |     |
| MDACC                             | Kuban, 2008               | 7      | CFRT escalation                           | 3D       | 151   | 78              | 39              | 2           | P         | 30           | 68  | 53  | 100             | 86  | 69  | 90                          | 71  | 1   | 5.5                          | 6.6 |     |
|                                   |                           |        |                                           | 3D       | 150   | 70              | 35              | 2           | P         | 31           | 71  | 48  | 88              | 83  | 54  | 83                          | 76  | 5   | 7.1                          | 1.3 |     |
| Dutch CKVO 96-10                  | Al-Mamgani, 2008          | 8      | CFRT escalation                           | 3D       | 333   | 78              | 39              | 2           | P         | 63           | 90  | 180 | N/A             | 70  | N/A | 82                          | 80  | 4   | 13                           | 6   |     |
|                                   |                           |        |                                           | 3D       | 331   | 68              | 34              | 2           | P         | 56           | 89  | 185 | N/A             | 60  | N/A | 83                          | 77  | 3   | 12                           | 4   |     |
| PROG 9509                         | Zietman, 2010             | 9      | CFRT escalation                           | 3D       | 195   | 79              | 44              | 1.8         | P         | 116          | 72  | 7   | 95              | 79  | N/A | 96                          | 83  | N/A | 1.5                          | 1   |     |
|                                   |                           |        |                                           | 3D       | 197   | 70              | 39              | 1.8         | P         | 111          | 76  | 10  | 75              | 68  | N/A | 97                          | 78  | N/A | 2                            | 0   |     |
| MRC RT01                          | Dearnaley, 2007           | 10     | CFRT escalation                           | 3D       | 422   | 74              | 37              | 2           | P         | 99           | 127 | 184 | 71              | 71  | N/A | 88                          | N/A | 7   | 4                            | 10  |     |
|                                   |                           |        |                                           | 3D       | 421   | 64              | 32              | 2           | P         | 95           | 137 | 175 | 60              | 60  | N/A | 89                          | N/A | 9   | 2                            | 6   |     |
| RTOG 9406                         | Michalski, 2010, 2012     | 11 12  | CFRT escalation                           | 3D       | 108   | 68              | 38              | 1.8         | P         | 55           | 37  | 69  | 68              | 70  | 42  | 90                          | 70  | N/A | 2                            | 2   |     |
|                                   |                           |        |                                           | 3D       | 300   | 74              | 41              | 1.8         | P         | 91           | 75  | 39  | 73              | 62  | 62  | 87                          | 66  | N/A | 3                            | 0   |     |
|                                   |                           |        |                                           | 3D       | 167   | 79              | 44              | 1.8         | P         | 85           | 54  | 36  | 67              | 70  | 70  | 88                          | 76  | N/A | 4                            | 2   |     |
|                                   |                           |        |                                           | 3D       | 256   | 74              | 37              | 2           | P         | 92           | 109 | 40  | 84              | 74  | 54  | 89                          | 70  | N/A | 4.5                          | 2.5 |     |
|                                   |                           |        |                                           | 3D       | 220   | 78              | 39              | 2           | P         | 80           | 109 | 32  | 80              | 69  | 67  | 88                          | 69  | N/A | 5.5                          | 5.5 |     |
| GETUG                             | Beckendorf, 2011          | 13     | CFRT escalation                           | 3D       | 153   | 70              | 35              | 2           | P         | -            | 153 | -   | -               | 68  | -   | 92                          | N/A | 1.9 | 2.6                          | 1.9 |     |
|                                   |                           |        |                                           | 3D       | 153   | 80              | 40              | 2           | P         | -            | 153 | -   | -               | 74  | -   | 92                          | N/A | 5.2 | 1.9                          | 5.9 |     |
| RTOG 0126                         | Michalski, 2014           | 14     | CFRT escalation; 3D-(CRT vs. IMRT subset) | 3D+ IMRT | 748   | 79              | 44              | 1.8         | P         | -            | 748 | -   | -               | 75  | -   | 88                          | 67  | 2   | N/A                          | N/A |     |
|                                   |                           |        |                                           | 3D+ IMRT | 751   | 70              | 39              | 1.8         | P         | -            | 751 | -   | -               | 60  | -   | 89                          | 66  | 3   | N/A                          | N/A |     |
|                                   |                           |        |                                           | 3D       | (491) | N/A             | N/A             | N/A         | P         | 30           | 68  | 53  | N/A             | N/A | N/A | N/A                         | N/A | N/A | N/A                          | 0.9 | 5.1 |
|                                   |                           |        |                                           | IMRT     | (257) | N/A             | N/A             | N/A         | P         | 31           | 71  | 48  | N/A             | N/A | N/A | N/A                         | N/A | N/A | N/A                          | 0.9 | 2.6 |
| NCI Canada                        | Lukka, 2005               | 15     | CFRT vs HFRT                              | 3D       | 470   | 66              | 33              | 2           | A         | -            | 470 | -   | N/A             | 53  | N/A | 85                          | 4   | N/A | 2.6                          | 1.9 |     |
|                                   |                           |        |                                           | 3D       | 466   | 52              | 20              | 2.63        | A         | -            | 466 | -   | N/A             | 60  | N/A | 88                          | 3   | N/A | 4.1                          | 1.9 |     |
| Australia                         | Yeoh, 2011                | 16     | CFRT vs HFRT                              | 3D       | 109   | 64              | 32              | 2           | P         | -            | 109 | -   | N/A             | 58  | N/A | 84                          | 3   | N/A | NR                           | NR  |     |
|                                   |                           |        |                                           | 3D       | 108   | 55              | 20              | 2.75        | P         | -            | 108 | -   | N/A             | 69  | N/A | 86                          | 1   | N/A | NR                           | NR  |     |
| Italy                             | Arcangeli, 2012           | 17     | CFRT vs HFRT                              | 3D       | 85    | 80              | 40              | 2           | P         | -            | -   | 85  | N/A             | N/A | 79  | 82                          | 8   | 10  | 0                            | 0   |     |
|                                   |                           |        |                                           | 3D       | 83    | 62              | 20              | 3.1         | P         | -            | -   | 83  | N/A             | N/A | 85  | 92                          | 2   | 14  | 0                            | 0   |     |
| FCCC                              | Pollack, 2013             | 18     | CFRT vs HFRT                              | IMRT     | 152   | 76              | 38              | 2           | P         | -            | 101 | 51  | N/A             | 86  | 86  | 90                          | 2   | 4   | 3.3                          | 2   |     |
|                                   |                           |        |                                           | IMRT     | 151   | 70              | 26              | 2.7         | P         | -            | 98  | 53  | N/A             | 86  | 86  | 88                          | 2   | 11  | 4                            | 2   |     |
| MDACC                             | Kuban, 2010               | 19     | CFRT vs HFRT                              | IMRT     | 102   | 76              | 42              | 1.8         | P         | 30           | 1   | 1   | 96              | 96  | N/A | N/A                         | N/A | N/A | 0.9                          | 1   |     |
|                                   |                           |        |                                           | IMRT     | 102   | 72              | 30              | 2.4         | P         | 30           | 1   | 1   | 97              | 97  | N/A | N/A                         | N/A | N/A | 0                            | 3   |     |
| 21 <sup>st</sup> Century Oncology | Mantz, 2014               | 20     | SBRT                                      | Gantry   | 102   | 40              | 5               | 8.0         | P         | 40           | -   | -   | 100             | N/A | N/A | N/A                         | N/A | N/A | NR                           | NR  |     |
| Winthrop University               | Katz, 2010, 2011          | 21, 22 | SBRT                                      | RA       | 304   | 35              | 5               | 7.0         | P         | 211          | 81  | 12  | 99              | 93  | 75  | N/A                         | N/A | N/A | 1.7                          | 0   |     |
| Genesis Healthcare                | Fuller, 2014              | 23     | SBRT                                      | RA       | 60    | 38              | 4               | 9.5         | P         | 40           | 39  | -   | 100             | 92  | N/A | N/A                         | N/A | N/A | 6                            | 0   |     |

**Abbreviations:** 3D-CRT: 3 dimensional conformal radiation therapy; CFRT: conventionally fractionated radiotherapy; CSM: cancer specific mortality; DM: distant metastasis; FCCC: Fox Chase Cancer Center; FFBF: freedom from biochemical failure; FU: follow-up; GETUG: French Groupe d' Étude des Tumeurs Uro-Génitales; GI: gastrointestinal; GU: genitourinary; H: high risk; HFRT: hypofractionated radiotherapy; I: intermediate risk; IMRT: intensity modulated radiation therapy; L: low risk; MDACC: MD Anderson Cancer Center; MRC: Medical Research Council; N/A not applicable; NCI: National Cancer Institute; OS: overall survival; PROG: Proton Radiation Oncology Group; RTOG: Radiation Therapy Oncology Group

**Note:** Studies are sorted by the RT fractionation scheme being tested. All studies evaluating CFRT escalation and CFRT vs. HFRT are phase II/III; those evaluating SBRT are controlled trials. The 5-year outcomes are rounded to nearest whole digit. The definition of FFBF (Phoenix, P; or ASTRO A) is listed.

Supplementary Table 4. BT boost and BT monotherapy for prostate cancer: outcomes and toxicity of prospective studies

| Study          | Ref.          | Type        | arms                 | n   | Total BT dose (Gy) | Gy/fraction | Total EBRT dose (Gy) | median FU (y) | Actuarial FU (v) | FFBF def. | FFBF % |     |     | RTOG late Grade 3-4 toxicity % |     |
|----------------|---------------|-------------|----------------------|-----|--------------------|-------------|----------------------|---------------|------------------|-----------|--------|-----|-----|--------------------------------|-----|
|                |               |             |                      |     |                    |             |                      |               |                  |           | L      | I   | H   | GU (stricture)                 | GI  |
| Demanes, 2005  | <sup>24</sup> | Prospective | HDR-BT + EBRT        | 209 | 23                 | 6           | 36                   | 7.3           | 7.3              | P         | 90     | 87  | 69  | 7.7 (6.7)                      | 0   |
| Hoskin, 2012   | <sup>25</sup> | Phase III   | EBRT                 | 108 | N/A                | N/A         | 55                   | 7.1           | 10               | P         | 60     | 62  | 70  | 4 (2)                          | 2   |
|                |               |             | HDR-BT + EBRT        | 110 | 17                 | 8           | 36                   | 7.1           | 10               | P         | 100    | 89  | 80  | 11 (8)                         | 0   |
| Duchesne, 2007 | <sup>26</sup> | Phase I/II  | HDR-BT + EBRT        | 108 | 16-20              | 4-5         | 46                   | 6.5           | 5                | P         | NR     | NR  | NR  | 4.5 (NR)                       | 2.8 |
| Demanes, 2009  | <sup>27</sup> | Prospective | HDR-BT + EBRT        | 200 | 23                 | 6           | 36                   | 6.4           | 10               | P         | 92     | 87  | 63  | 0 (0)                          | 0   |
|                |               |             | HDR-BT + EBRT<br>ADT | 211 | 23                 | 6           | 36                   | 6.4           | 10               | P         | 92     | 87  | 63  | 0 (0)                          | 0   |
| Galalae, 2006  | <sup>28</sup> | Phase II    | HDR-BT + EBRT        | 122 | 18                 | 6           | 46-50                | 4.5           | 5                | A         | N/A    | 90  | N/A | NR                             | NR  |
|                |               |             |                      | 25  | 18                 | 6           | 46-50                | 5.5           | 5                | A         | N/A    | N/A | 68  | NR                             | NR  |
|                |               |             |                      | 95  | 21                 | 10          | 46-50                | 5.5           | 5                | A         | N/A    | N/A | 85  | NR                             | NR  |
|                |               |             |                      | 23  | 18                 | 6           | 46-50                | 6.5           | 5                | A         | N/A    | N/A | N/A | NR                             | NR  |
|                |               |             |                      | 57  | 21                 | 10          | 46-50                | 6.5           | 5                | A         | N/A    | N/A | N/A | NR                             | NR  |
| Hurwitz, 2011  | <sup>30</sup> | Phase II    | LDR-BT + EBRT + ADT  | 61  | 145                | N/A         | N/A                  | 6.1           |                  | P         | N/A    | 85  | N/A | NR                             | NR  |
| Kalkner, 2007  | <sup>29</sup> | Phase I/II  | HDR-BT + EBRT        | 154 | 20                 | 10          | 50                   | 6.1           | 5                | P         | 97     | 83  | 83  | 5 (NR)                         | 1   |
| Lawton, 2007   | <sup>31</sup> | Phase II    | LDR-BT               | 101 | 145                | N/A         | None                 | 5.3           | 5                | P         | 94     | N/A | N/A | NR                             | NR  |
| Tang, 2006     | <sup>32</sup> | Phase I/II  | HDR-BT + EBRT        | 47  | 16                 | 4           | 46                   | 5             | 5                | P         | 76     | 68  | 33  | NR                             | NR  |
|                |               |             | HDR-BT + EBRT        | 41  | 20                 | 5           | 46                   | 5             | 5                | P         |        |     |     | NR                             | NR  |
|                |               |             | EBRT                 | 104 | N/A                | N/A         | 66                   | 4.7           | 5                | A         |        |     |     | NR                             | 71  |
| Galalae, 2004  | <sup>33</sup> | Phase II    | HDR-BT + EBRT        | 46  | 16-30              | 6-12        | 45.6-50              | 5             | 5                | A         | 96     | N/A | N/A | NR                             | NR  |
|                |               |             |                      | 188 | 16-30              | 6-12        | 45.6-50              | 5             | 5                | A         | N/A    | 88  | N/A | NR                             | NR  |
|                |               |             |                      | 359 | 16-30              | 6-12        | 45.6-50              | 5             | 5                | A         | N/A    | N/A | 69  | NR                             | NR  |
| Demanes, 2011  | <sup>34</sup> | Prospective | HDR-BT               | 157 | 42                 | 7           | None                 | 5.2           | 8                | P         | 97     | 97  | N/A | NR                             | NR  |
|                |               |             | HDR-BT               | 141 | 38                 | 9.5         | None                 |               |                  |           | P      | 97  | 97  | N/A                            | NR  |

Abbreviations: ADT: androgen deprivation therapy; EBRT: external beam radiation therapy; FFBF: freedom from biochemical failure; FU: follow-up; GI: gastrointestinal; GU: genitourinary; H: high-risk; HDR-BTb: high dose rate brachytherapy boost; I: intermediate risk; L: low risk; N/A: not applicable; NR: not reported; RTOG: Radiation Therapy Oncology Group;

Note: Gy rounded to whole numbers. Studies sorted by longest median FU time.









## **SUPPLEMENTARY MATERIAL - FIGURES**

### **Sup Figure 1.**

Title: Characteristic PSA curves after treatment.

Legend: Different RT modalities have different trends in post-treatment PSA. The Phoenix definition (i.e. nadir + 2 ng/mL -- circled on the right) following treatment is preferred in defining BF. EBRT typically induces a slow and inconsistent decrease in PSA to levels that are typically still detectable. After EBRT, PSA may still be detectable. After LDR-BT, PSA has been noted to decrease to < 0.3 ng/mL in most men with localized disease. After HDR-BT, there is typically a very low PSA nadir (e.g. < 0.05 ng/mL). All RT modalities may induce a PSA bounce (i.e. a temporary elevation in PSA without disease recurrence -- circled on the left). For EBRT, this occurs within 3 years after RT; bounces will normalize within about one year. It is important to understand that PSA bounces after RT are common and do not automatically represent cancer recurrence.

Abbreviations: BT: brachytherapy; EBRT: external beam radiation therapy; HDR: high dose rate; LDR: low dose rate; PSA: prostate specific antigen; RT: radiation therapy

### **Sup Figure 2.**

Title: Timeline of RT evolution.

Legend: The timeline for the development of EBRT and BT for prostate cancer. The shift from 3D conformal radiation therapy to IMRT (with MLCs) during the 1990s, theoretical radiobiological models from 2001 (which support the use of high doses per fraction, such as those in HFRT, SBRT, and HDR-BT), development of HDR-BT (to use in place of LDR-BT) in the 1980s, and advances in image guided radiation therapy (IGRT) for EBRT since the 1980s

have influenced the evolution of RT modalities, including HFRT, SBRT, HDR-BT, and particle beam therapy (e.g. protons).

Abbreviations: BT: brachytherapy; CFRT: conventionally fractionated radiation therapy; EBRT: external beam radiation therapy; HDR: high dose rate; HFRT: hypofractionated radiation therapy; IGRT: image guided radiation therapy; LDR: low dose rate; IMPT: intensity modulated proton therapy; MLC: multi leaf collimator; PSA: prostate specific antigen; RALS: remote afterloading system; RT: radiation therapy; SBRT: stereotactic body radiation therapy;
